# Supplementary figures and images for: Standardization of the assessment process within telerehabilitation in chronic diseases: A scoping meta-review
Source: Research Square preprint supplement (doi:10.21203/rs.3.rs-568354/v2), 2022-03-07

**Additional file 3: Types of technological tools used in telerehabilitation**

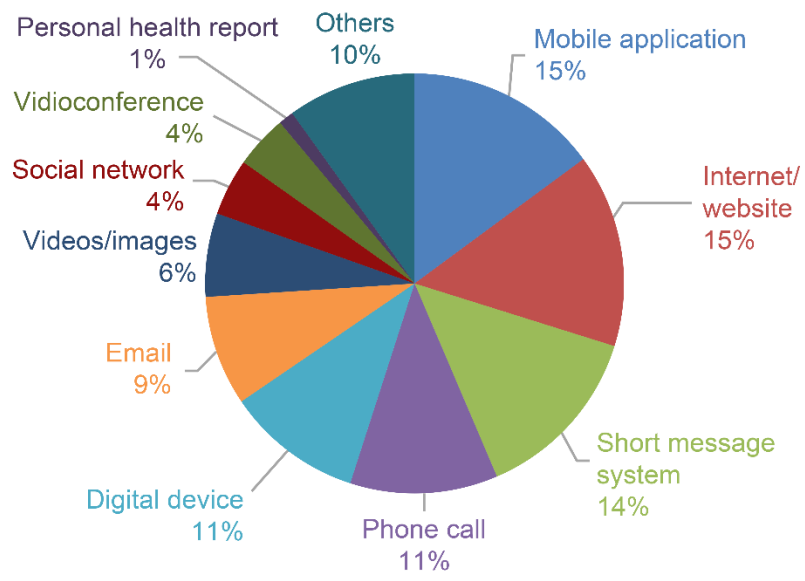

Supplement: Supplementary file 1 [file 95f53c87bf9ee69715fd43a1.pdf]
